# Supplementary material for: A rhodamine based fluorescent and colorimetric chemosensor for the detection of Cr3+ ions and its utility in a molecular logic gate
Source: Royal Society of Chemistry journal article supplement (doi:10.1039/d3ay00783a), 2023-01-01
Supplement: d3ay00783a1.pdf [file d3ay00783a1.pdf]

## Electronic Supplementary Information

### A rhodamine based fluorescent and colorimetric chemosensor for the detection of Cr<sup>3+</sup> and its utility in molecular logic gate

Swati Negi,<sup>a</sup> Parveen Gahlyan,<sup>a,b</sup> Rashim Bawa,<sup>a</sup> Bholey Singh,<sup>c</sup> Mamta Bhandari,<sup>d</sup> Rita Kakkar,<sup>d</sup> Balaram Pani,<sup>e</sup> Rakesh Kumar<sup>a\*</sup>

<sup>a</sup> Bioorganic Laboratory, Department of Chemistry, University of Delhi, Delhi, 110007, India

<sup>b</sup> Department of Chemistry, Shivaji College, University of Delhi, Delhi-110027, India

<sup>c</sup> Department of Chemistry, Swami Shraddhanand College, University of Delhi, Delhi-110036, India

<sup>d</sup> Computational Chemistry Group, Department of Chemistry, University of Delhi, Delhi-110007, India

<sup>e</sup> Department of Chemistry, Bhaskaracharya College of Applied Sciences, University of Delhi, Delhi-110075, India

\*Email: [rakeshkp@email.com](mailto:rakeshkp@email.com)

### Figure Caption

Figure 1. <sup>1</sup>H NMR of compound 4 in (DMSO-*d*<sub>6</sub>, 400 MHz)

Figure 2. <sup>13</sup>C NMR of compound 4 in (DMSO-*d*<sub>6</sub>, 100 MHz)

Figure 3. <sup>1</sup>H NMR of compound S1 in (DMSO-*d*<sub>6</sub>, 400 MHz)

Figure 4. <sup>13</sup>C NMR of compound S1 in DMSO-*d*<sub>6</sub>, 100 MHz)

Table 1. The Sensing abilities of various chemosensors for Cr<sup>3+</sup> ions reported in literature

Figure 5. 1D arrangement of S1 via intra- and intermolecular non-covalent interactions between the adjacent molecules.

Figure 6. Double decker π-stacked arrangement of two phenolic rings and hydrogen bonding between the adjacent molecules.

Table 2. Crystal data and structure refinement for compound

Figure 7. Predicted absorption spectrum of S1.

Figure 8. Optimized structure of S1

Figure 9. Optimized structure of S1-Cr<sup>3+</sup>

Figure 10. Filter Paper strip application

## Experiment

### Procedure for Synthesis of Compound 4

Diethyl 2, 6-dimethyl-4-(4-nitrophenyl)-1, 4-dihydropyridine-3, 5-dicarboxylate (**1**, 2 g, 1 mmol) and selenium dioxide (740 mg, 2.5 mmol) were dissolved in 1, 4-dioxane in a round bottom flask. After the addition, the reaction mixture was refluxed for 10 mins. The reaction progress was monitored by thin layer chromatography. When reaction was completed then the reaction mixture was cooled at room temperature and then filtered to remove selenium. The obtained filtrate was then evaporated under reduced pressure to obtain the crude product. The desired pure aldehyde was then obtained by column chromatography (hexane: ethyl acetate, 7:3, v/v) in 59 % yield.

$^1\text{H}$  NMR (400 MHz,  $\text{DMSO-}d_6$ ):  $\delta$  ppm 9.95 (s, 1H), 8.30 (d,  $J = 8.8$  Hz, 2H), 7.47 (d,  $J = 8.8$  Hz, 2H), 4.01 (m,  $J = 7.1, 2.2$  Hz, 4H), 2.63 (s, 3H), 0.92 (t,  $J = 7.1$  Hz, 3H), 0.85 (t,  $J = 7.1$  Hz, 3H).  $^{13}\text{C}$  NMR (100 MHz,  $\text{DMSO-}d_6$ ):  $\delta$  ppm 192.7, 166.0, 165.4, 157.2, 147.6, 144.7, 140.7, 130.4, 123.5, 62.5, 62.2, 22.5, 13.5. IR (KBr,  $\text{cm}^{-1}$ ): 2895, 2860 and 1720. Melting Point: 130-132 °C. HRMS ( $m/z$ ): Calculated for  $\text{C}_{19}\text{H}_{18}\text{N}_2\text{O}_7$  387.1148, obtained 387.1187.

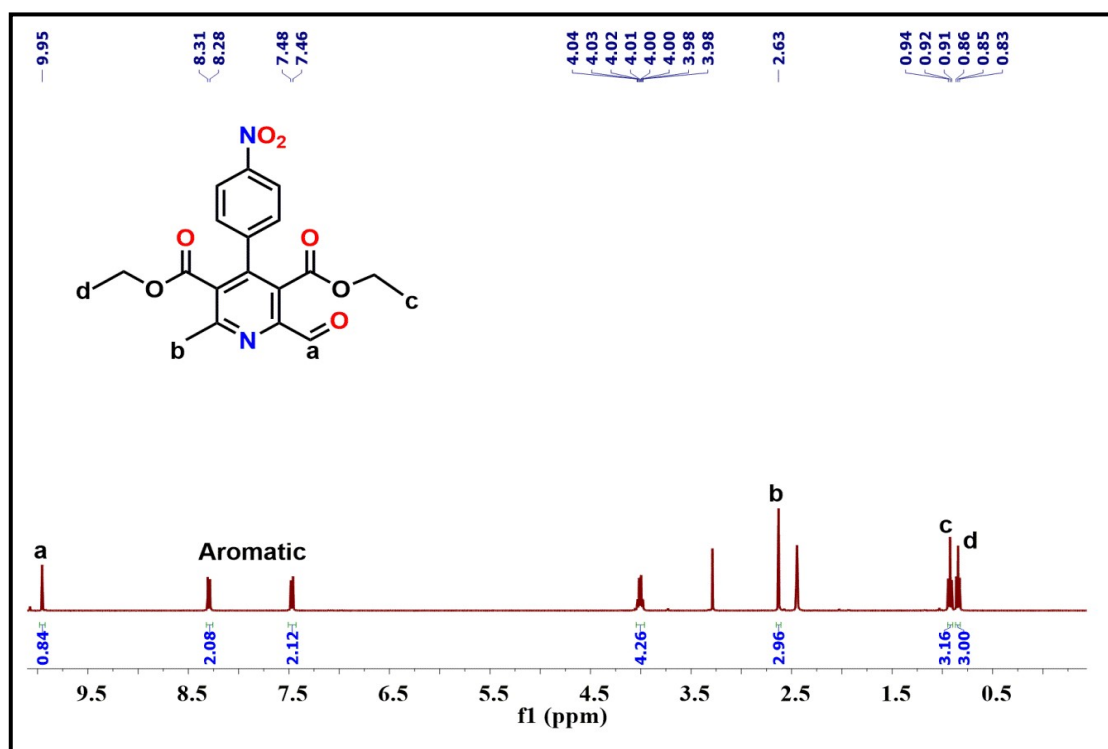

Figure 1:  $^1\text{H}$  NMR of compound 4 in  $\text{DMSO-}d_6$

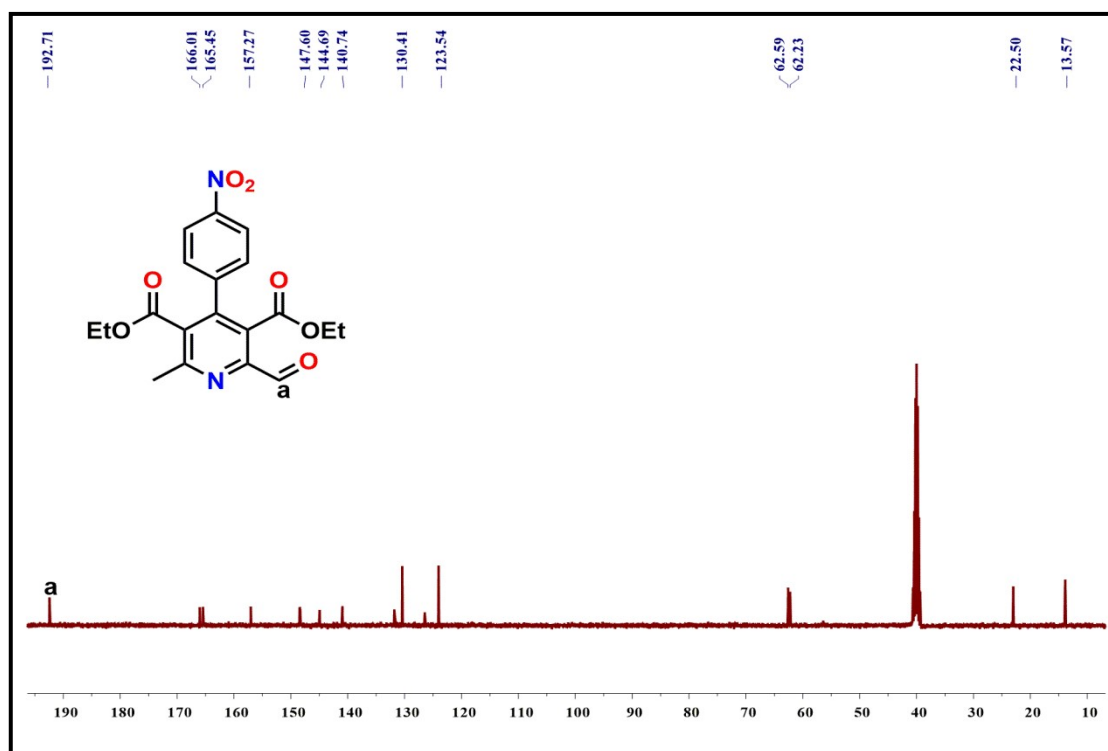

Figure 2:  $^1\text{H}$  NMR of compound 4 in  $\text{DMSO-}d_6$

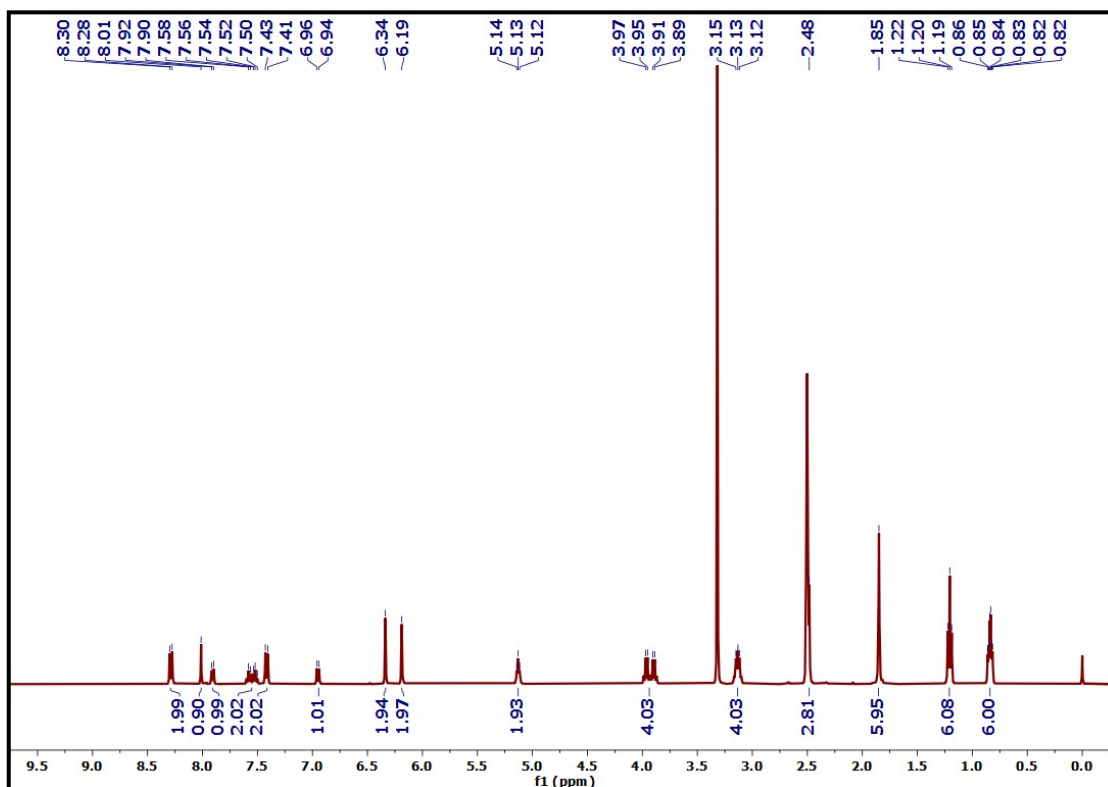

**Figure 3:**  $^1\text{H}$  NMR of compound **S1** in  $\text{DMSO-}d_6$

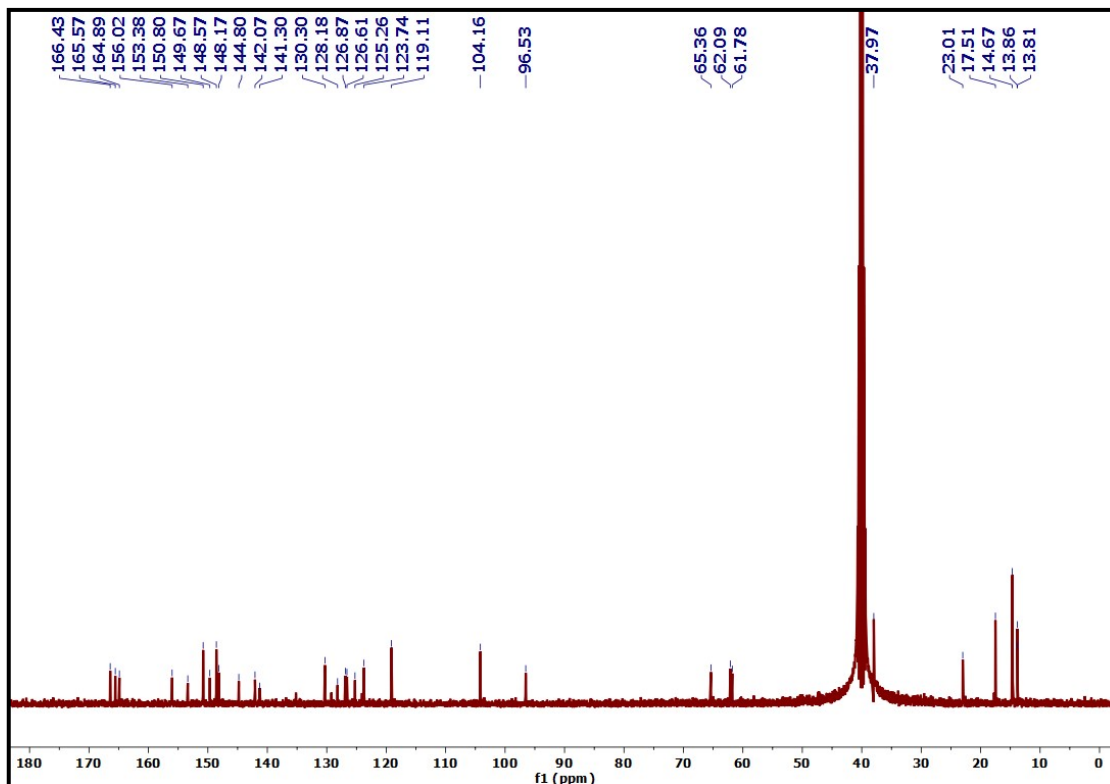

**Figure 4:**  $^{13}\text{C}$  NMR of compound **S1** in  $\text{DMSO-}d_6$

The chemosensor **S1** exhibit remarkably good sensing ability as compared to various literature reported chemosensors for detection of  $\text{Cr}^{3+}$  as shown in Table 1.

**Table 1.** The Sensing abilities of various chemosensors for  $\text{Cr}^{3+}$  ions reported in literature.

| S.No. | Chemosensors | Detection Limit<br>(in $\mu\text{M}$ ) | Ref. |
|-------|--------------|----------------------------------------|------|
| 1.    |              | 0.59                                   | 1    |

|    |                                                                                     |      |              |
|----|-------------------------------------------------------------------------------------|------|--------------|
| 2. | 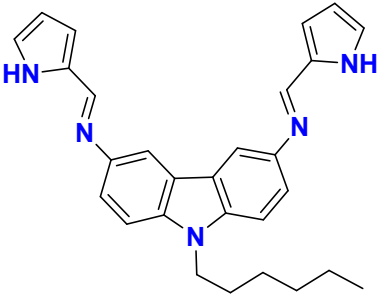   | 1.08 | 2            |
| 3. |    | 0.96 | 3            |
| 4. |   | 1.21 | 4            |
| 5. |  | 0.54 | 5            |
| 6. |  | 0.21 | Present Work |

### Single crystal X-ray diffraction analysis

Crystals of compound **S1** were grown by allowing slow evaporation of the saturated acetonitrile solvent at room temperature for SC-XRD studies. Good quality needle shaped colorless crystals were withdrawn and exposed to X-rays on a Bruker diffractometer employing a graphite

monochromatized Mo/K $\alpha$  radiation ( $\lambda = 0.71073 \text{ \AA}$ ) at temperature 273 K. The crystal data was reduced using CrysAlis pro software available with the diffractometer. Further, least square refinement after introduction of anisotropic displacement parameters yielded the R values mentioned in **Table 2**. The structure was solved by direct methods using SHELXT-2014 and refined by the full-matrix least-squares method on Olex2.refine 1.5. All calculations were carried out using the OLEX2 package of the crystallographic programs.<sup>6</sup> For the molecular graphics, the program Mercury (2022.3.0) was used.<sup>7</sup> The selected cell parameters, *etc.* are given in **Table 2**.

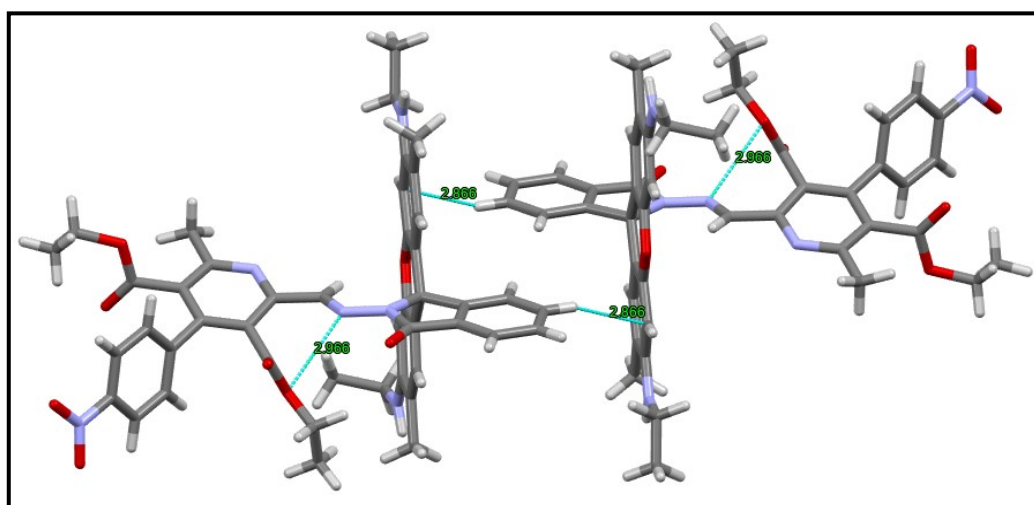

**Figure 5:** 1D arrangement of S1 *via* intra- and intermolecular non-covalent interactions between the adjacent molecules.

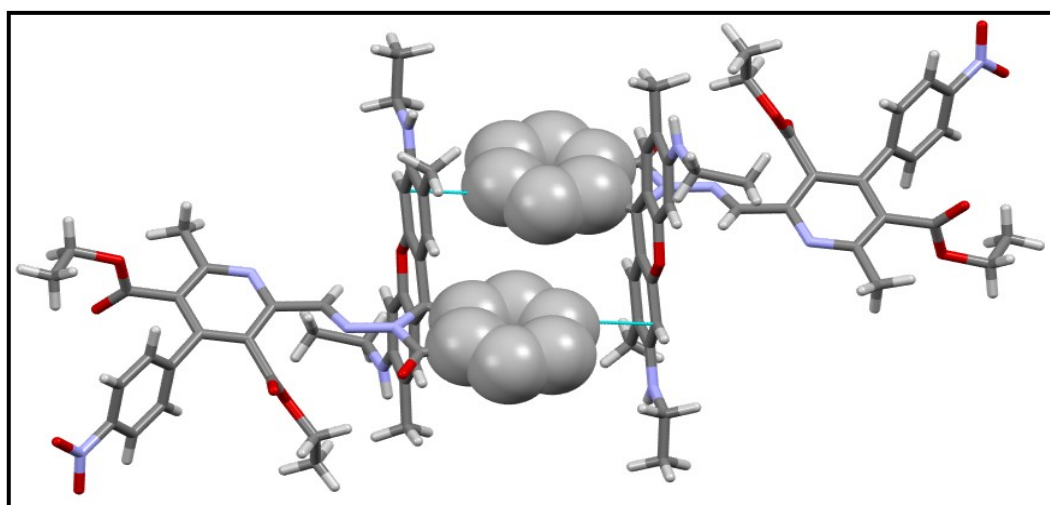

**Figure 6:** Double decker  $\pi$ -stacked arrangement of two phenolic rings and hydrogen bonding between the adjacent molecules.

## Accession Codes

CCDC 2239138 contains the supplementary crystallographic data for ligand **S1** for this paper. This data can be obtained free of charge via [www.ccdc.cam.ac.uk/data\\_request/cif](http://www.ccdc.cam.ac.uk/data_request/cif), or by emailing [data\\_request@ccdc.cam.ac.uk](mailto:data_request@ccdc.cam.ac.uk), or by contacting The Cambridge Crystallographic Data Centre, 12 Union Road, Cambridge CB2 1EZ, UK; fax: +44 1223 336033.

| <b>Table 2. Crystal data and structure refinement for compound</b> |                                                               |
|--------------------------------------------------------------------|---------------------------------------------------------------|
| <b>Identification code</b>                                         | <b>S1</b>                                                     |
| Empirical formula                                                  | C <sub>45</sub> H <sub>44</sub> N <sub>6</sub> O <sub>8</sub> |
| Temperature/K                                                      | 273(2)                                                        |
| Crystal system                                                     | monoclinic                                                    |
| Space group                                                        | P-1                                                           |
| a/Å                                                                | 9.2544(18)                                                    |
| b/Å                                                                | 14.853(3)                                                     |
| c/Å                                                                | 15.963(3)                                                     |
| $\alpha$ /°                                                        | 86.399(6)                                                     |
| $\beta$ /°                                                         | 78.902(6)                                                     |
| $\gamma$ /°                                                        | 85.910(6)                                                     |
| Volume/Å <sup>3</sup>                                              | 2144.9(7)                                                     |
| Z                                                                  | 43                                                            |
| $\rho_{\text{calc}}/\text{g cm}^{-3}$                              | 1.432                                                         |
| $\mu/\text{mm}^{-1}$                                               | 0.132                                                         |
| F(000)                                                             | 946.927                                                       |
| Radiation                                                          | Mo/K $\alpha$ ( $\lambda = 0.71073$ )                         |
| 2 $\theta$ range for data collection/°                             | 2.25 to 28.35                                                 |
| Index ranges                                                       | $-12 \leq h \leq 12, -19 \leq k \leq 19, 0 \leq l \leq 21$    |
| No of Reflections measured                                         | 10680                                                         |
| Independent reflections                                            | 7068                                                          |
| Goodness-of-fit on F <sup>2</sup>                                  | 1.081                                                         |
| R [F <sup>2</sup> > 2 $\sigma$ (F <sup>2</sup> )], wR(all data)    | 0.0631,<br>0.2002                                             |

## DFT Calculations of S1 and S1-Cr<sup>3+</sup>

The simulated spectrum is depicted in **Figure 7**

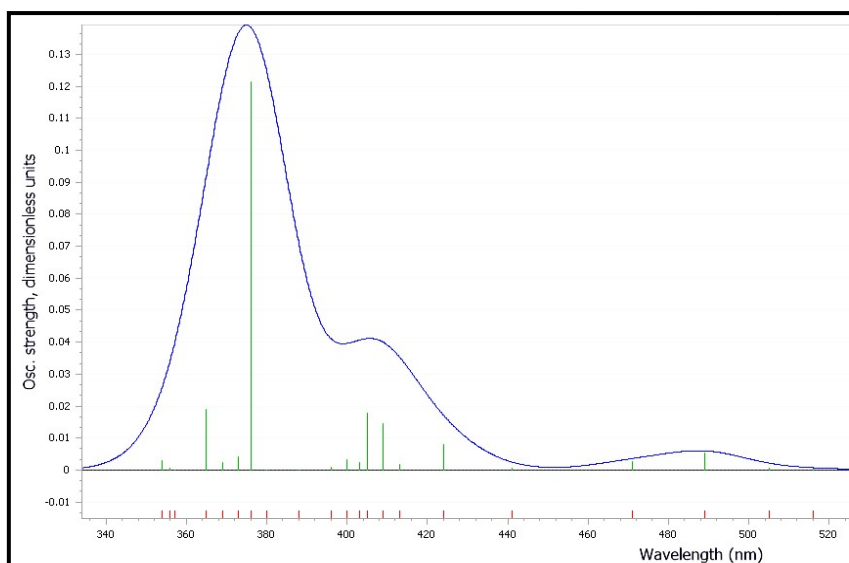

**Figure 7: Predicted absorption spectrum of S1.**

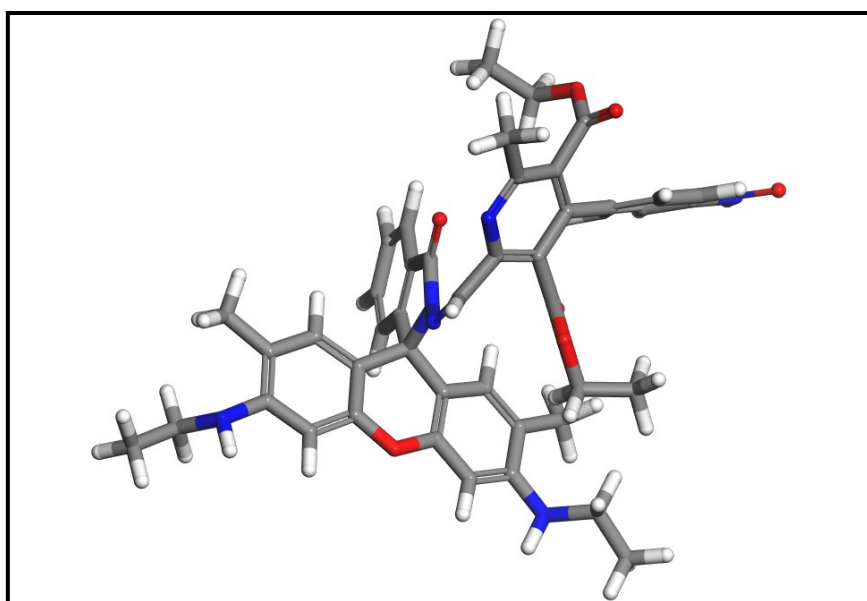

**Figure 8: Optimized structure of S1**

| Final coordinates (Angstroms) |           |           |           |
|-------------------------------|-----------|-----------|-----------|
| ATOM                          | X         | Y         | Z         |
| 1 C                           | -3.074714 | -1.352920 | -0.080309 |
| 2 C                           | -3.164308 | -2.618486 | 0.506213  |
| 3 O                           | -2.120531 | -3.524320 | 0.519334  |



|    |   |           |           |           |
|----|---|-----------|-----------|-----------|
| 4  | C | -1.038521 | -3.255076 | -0.294024 |
| 5  | C | -0.835394 | -2.016764 | -0.911071 |
| 6  | C | -1.768359 | -0.850511 | -0.663042 |
| 7  | C | -4.223310 | -0.551964 | -0.045042 |
| 8  | C | -5.428205 | -0.953301 | 0.529483  |
| 9  | C | -5.494827 | -2.254882 | 1.094695  |
| 10 | C | -4.353672 | -3.062909 | 1.080717  |
| 11 | C | -0.139062 | -4.305670 | -0.479193 |
| 12 | C | 0.968407  | -4.171192 | -1.326739 |
| 13 | C | 1.163123  | -2.945289 | -2.018611 |
| 14 | C | 0.265260  | -1.908126 | -1.772544 |
| 15 | C | -6.583200 | 0.006507  | 0.605867  |
| 16 | N | -6.672129 | -2.720493 | 1.718499  |
| 17 | C | -7.861138 | -2.957788 | 0.880125  |
| 18 | C | -9.031158 | -3.425762 | 1.734206  |
| 19 | C | 2.260214  | -2.753665 | -3.030281 |
| 20 | N | 1.829047  | -5.272336 | -1.533872 |
| 21 | C | 3.219941  | -5.162540 | -1.056904 |
| 22 | C | 4.017869  | -6.407555 | -1.415635 |
| 23 | N | -1.126624 | 0.180639  | 0.272757  |
| 24 | C | -1.185828 | 1.487302  | -0.252889 |
| 25 | C | -1.657038 | 1.336486  | -1.641864 |
| 26 | C | -1.976261 | 0.004681  | -1.899224 |
| 27 | C | -1.802472 | 2.325548  | -2.614707 |
| 28 | C | -2.266495 | 1.940268  | -3.872523 |
| 29 | C | -2.577544 | 0.597915  | -4.137387 |
| 30 | C | -2.434472 | -0.384600 | -3.152963 |
| 31 | O | -0.930962 | 2.530126  | 0.350384  |
| 32 | N | -1.096137 | -0.175857 | 1.586294  |
| 33 | C | -0.411569 | 0.463688  | 2.479088  |
| 34 | C | 0.563018  | 1.577120  | 2.391348  |
| 35 | C | 1.663255  | 1.569334  | 1.509102  |
| 36 | C | 2.429301  | 2.744324  | 1.392897  |
| 37 | C | 2.113203  | 3.821148  | 2.243164  |
| 38 | C | 1.123582  | 3.656165  | 3.234771  |
| 39 | N | 0.357232  | 2.559441  | 3.282684  |
| 40 | C | 0.894840  | 4.697072  | 4.294489  |
| 41 | C | 2.893403  | 5.102789  | 2.196285  |
| 42 | O | 2.683591  | 5.963135  | 1.162041  |
| 43 | O | 3.709246  | 5.394528  | 3.056942  |
| 44 | C | 1.550749  | 5.793705  | 0.255251  |
| 45 | C | 0.347030  | 6.568262  | 0.757050  |
| 46 | C | 3.573515  | 2.849123  | 0.448889  |
| 47 | C | 4.868587  | 3.073035  | 0.947248  |
| 48 | C | 5.955192  | 3.161928  | 0.082919  |
| 49 | C | 5.734463  | 3.041820  | -1.288906 |
| 50 | C | 4.457052  | 2.840106  | -1.814214 |
| 51 | C | 3.380434  | 2.738707  | -0.940783 |
| 52 | C | 2.067679  | 0.314983  | 0.806225  |
| 53 | O | 2.347367  | -0.644265 | 1.728747  |
| 54 | O | 2.166137  | 0.166294  | -0.404328 |
| 55 | C | 2.749264  | -1.944491 | 1.192407  |
| 56 | C | 4.226820  | -1.962063 | 0.849507  |
| 57 | N | 6.877475  | 3.137308  | -2.207964 |
| 58 | O | 8.007631  | 3.299452  | -1.713976 |
| 59 | O | 6.648438  | 3.047392  | -3.427926 |
| 60 | H | -4.162142 | 0.456116  | -0.460663 |
| 61 | H | -4.379135 | -4.069227 | 1.501392  |
| 62 | H | -0.321971 | -5.245303 | 0.044449  |
| 63 | H | 0.425620  | -0.959145 | -2.285356 |
| 64 | H | -7.153594 | -0.145554 | 1.534010  |
| 65 | H | -6.224758 | 1.044621  | 0.585228  |
| 66 | H | -7.286784 | -0.109890 | -0.236265 |
| 67 | H | -6.468471 | -3.565970 | 2.252026  |
| 68 | H | -7.646538 | -3.698166 | 0.083776  |
| 69 | H | -8.124365 | -2.019976 | 0.372836  |
| 70 | H | -9.916902 | -3.605399 | 1.109274  |
| 71 | H | -8.795365 | -4.368943 | 2.252070  |
| 72 | H | -9.282822 | -2.674397 | 2.494911  |
| 73 | H | 1.953301  | -2.021229 | -3.789345 |
| 74 | H | 3.185483  | -2.367151 | -2.570967 |
| 75 | H | 2.502357  | -3.699876 | -3.535012 |
| 76 | H | 1.410692  | -6.115833 | -1.140052 |
| 77 | H | 3.249348  | -4.997047 | 0.039420  |
| 78 | H | 3.678374  | -4.278300 | -1.519367 |
| 79 | H | 5.048709  | -6.322069 | -1.044817 |
| 80 | H | 3.576585  | -7.308309 | -0.960185 |

|     |   |           |           |           |
|-----|---|-----------|-----------|-----------|
| 81  | H | 4.045647  | -6.556415 | -2.503948 |
| 82  | H | -1.552671 | 3.361513  | -2.382666 |
| 83  | H | -2.388348 | 2.686315  | -4.659455 |
| 84  | H | -2.938156 | 0.316505  | -5.127406 |
| 85  | H | -2.681779 | -1.427285 | -3.355865 |
| 86  | H | -0.609344 | 0.111981  | 3.496993  |
| 87  | H | 0.011931  | 4.426160  | 4.883220  |
| 88  | H | 1.773070  | 4.769990  | 4.953923  |
| 89  | H | 0.750350  | 5.698023  | 3.860084  |
| 90  | H | 1.311699  | 4.730012  | 0.122138  |
| 91  | H | 1.914710  | 6.192350  | -0.700943 |
| 92  | H | -0.462790 | 6.521819  | 0.014650  |
| 93  | H | -0.034286 | 6.136756  | 1.693058  |
| 94  | H | 0.604585  | 7.622564  | 0.930140  |
| 95  | H | 5.021299  | 3.168881  | 2.022032  |
| 96  | H | 6.966741  | 3.325580  | 0.449289  |
| 97  | H | 4.331414  | 2.760195  | -2.892013 |
| 98  | H | 2.379228  | 2.556983  | -1.328594 |
| 99  | H | 2.122202  | -2.167012 | 0.320618  |
| 100 | H | 2.508707  | -2.644409 | 2.003698  |
| 101 | H | 4.516811  | -2.971597 | 0.523987  |
| 102 | H | 4.444670  | -1.259858 | 0.034111  |
| 103 | H | 4.838251  | -1.695508 | 1.722883  |

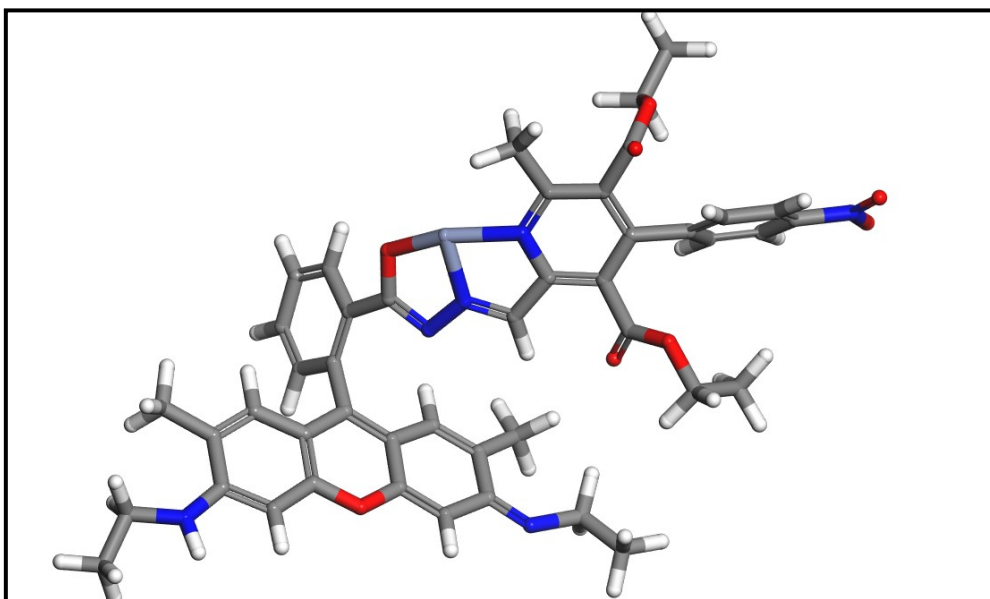

**Figure 9:** Optimized structure of S1-Cr<sup>3+</sup>

Final Coordinates (Angstroms)

| ATOM | X | Y         | Z         |           |
|------|---|-----------|-----------|-----------|
| 1    | C | -4.670967 | -2.263048 | -0.332941 |
| 2    | C | -4.461978 | -3.528629 | 0.296297  |
| 3    | O | -3.246356 | -4.147235 | 0.248870  |
| 4    | C | -2.255298 | -3.639516 | -0.560962 |
| 5    | C | -2.445809 | -2.424950 | -1.294217 |
| 6    | C | -3.639778 | -1.694662 | -1.127341 |
| 7    | C | -5.960692 | -1.687169 | -0.160437 |

|    |   |            |           |           |
|----|---|------------|-----------|-----------|
| 8  | C | -7.017464  | -2.315088 | 0.472892  |
| 9  | C | -6.789278  | -3.643018 | 1.012929  |
| 10 | C | -5.477989  | -4.187750 | 0.955268  |
| 11 | C | -1.082811  | -4.344603 | -0.632291 |
| 12 | C | 0.017654   | -3.901259 | -1.461258 |
| 13 | C | -0.224812  | -2.740380 | -2.346574 |
| 14 | C | -1.408279  | -2.054258 | -2.204663 |
| 15 | C | -8.330091  | -1.582590 | 0.574263  |
| 16 | N | -7.744557  | -4.420125 | 1.585275  |
| 17 | C | -9.213425  | -4.308403 | 1.601103  |
| 18 | C | -9.834533  | -5.632861 | 2.025117  |
| 19 | C | 0.745486   | -2.312765 | -3.408609 |
| 20 | N | 1.113032   | -4.609303 | -1.299127 |
| 21 | C | 2.407779   | -4.374403 | -1.877210 |
| 22 | C | 3.476754   | -5.192324 | -1.154103 |
| 23 | N | -1.496464  | 0.401337  | -0.294086 |
| 24 | C | -2.522207  | 1.199402  | -0.533722 |
| 25 | C | -3.538460  | 0.868338  | -1.545526 |
| 26 | C | -3.942318  | -0.448112 | -1.898437 |
| 27 | C | -4.046362  | 1.962399  | -2.278020 |
| 28 | C | -4.892555  | 1.777059  | -3.366560 |
| 29 | C | -5.252114  | 0.482427  | -3.745608 |
| 30 | C | -4.795230  | -0.608575 | -3.001604 |
| 31 | O | -2.543083  | 2.426369  | 0.011867  |
| 32 | N | -0.591835  | 1.122436  | 0.451341  |
| 33 | C | 0.689262   | 0.738709  | 0.489291  |
| 34 | C | 1.565199   | 1.734350  | 1.007822  |
| 35 | C | 2.975935   | 1.677636  | 1.040837  |
| 36 | C | 3.698117   | 2.828860  | 1.420958  |
| 37 | C | 2.974412   | 3.946369  | 1.921572  |
| 38 | C | 1.575174   | 3.931535  | 1.937914  |
| 39 | N | 0.885064   | 2.873729  | 1.432187  |
| 40 | C | 0.750261   | 5.066861  | 2.471970  |
| 41 | C | 3.679670   | 5.091607  | 2.620284  |
| 42 | O | 4.143348   | 6.149323  | 1.942058  |
| 43 | O | 3.786003   | 5.030237  | 3.835553  |
| 44 | C | 3.969044   | 6.275391  | 0.485733  |
| 45 | C | 4.627765   | 7.574336  | 0.077618  |
| 46 | C | 5.166419   | 2.926414  | 1.213715  |
| 47 | C | 6.051065   | 3.271545  | 2.251734  |
| 48 | C | 7.413789   | 3.424865  | 1.991704  |
| 49 | C | 7.878479   | 3.233858  | 0.691901  |
| 50 | C | 7.028108   | 2.891621  | -0.358535 |
| 51 | C | 5.669436   | 2.734695  | -0.090467 |
| 52 | C | 3.641007   | 0.374012  | 0.667246  |
| 53 | O | 4.648691   | 0.091736  | 1.504134  |
| 54 | O | 3.243852   | -0.344267 | -0.245785 |
| 55 | C | 5.353798   | -1.190394 | 1.282886  |
| 56 | C | 6.412420   | -1.080088 | 0.202812  |
| 57 | N | 9.328783   | 3.399079  | 0.416235  |
| 58 | O | 10.045596  | 3.779238  | 1.348206  |
| 59 | O | 9.722866   | 3.138768  | -0.727494 |
| 60 | H | -6.131171  | -0.692633 | -0.572288 |
| 61 | H | -5.273124  | -5.170948 | 1.381938  |
| 62 | H | -0.937553  | -5.249106 | -0.041884 |
| 63 | H | -1.587252  | -1.181596 | -2.834803 |
| 64 | H | -8.712439  | -1.558045 | 1.603895  |
| 65 | H | -8.203312  | -0.544971 | 0.242424  |
| 66 | H | -9.107016  | -2.034424 | -0.058955 |
| 67 | H | -7.403323  | -5.307434 | 1.953523  |
| 68 | H | -9.559873  | -4.033829 | 0.595562  |
| 69 | H | -9.520464  | -3.510829 | 2.294264  |
| 70 | H | -10.929179 | -5.543788 | 2.013192  |
| 71 | H | -9.560098  | -6.445159 | 1.336414  |
| 72 | H | -9.536476  | -5.910823 | 3.047274  |
| 73 | H | 0.285797   | -1.554775 | -4.054867 |
| 74 | H | 1.665473   | -1.881759 | -2.984750 |
| 75 | H | 1.051690   | -3.157199 | -4.042410 |
| 76 | H | 2.673976   | -3.301774 | -1.863654 |
| 77 | H | 2.380784   | -4.670014 | -2.945594 |
| 78 | H | 4.461223   | -5.021699 | -1.610783 |
| 79 | H | 3.523366   | -4.905207 | -0.094214 |
| 80 | H | 3.247284   | -6.264533 | -1.206832 |
| 81 | H | -3.735682  | 2.967197  | -1.992334 |
| 82 | H | -5.257681  | 2.638393  | -3.925029 |
| 83 | H | -5.895845  | 0.315986  | -4.609448 |
| 84 | H | -5.103515  | -1.618748 | -3.278008 |

|     |    |           |           |           |
|-----|----|-----------|-----------|-----------|
| 85  | H  | -0.245103 | 4.712279  | 2.795287  |
| 86  | H  | 1.216380  | 5.521769  | 3.357105  |
| 87  | H  | 0.610877  | 5.862546  | 1.722897  |
| 88  | H  | 2.890750  | 6.281822  | 0.266375  |
| 89  | H  | 4.439509  | 5.409268  | -0.003057 |
| 90  | H  | 4.552350  | 7.700532  | -1.011838 |
| 91  | H  | 4.141353  | 8.433169  | 0.560388  |
| 92  | H  | 5.690730  | 7.572482  | 0.353795  |
| 93  | H  | 5.679884  | 3.407837  | 3.267602  |
| 94  | H  | 8.113920  | 3.698007  | 2.781063  |
| 95  | H  | 7.438704  | 2.760771  | -1.359309 |
| 96  | H  | 4.989228  | 2.480821  | -0.906449 |
| 97  | H  | 4.597660  | -1.948422 | 1.044209  |
| 98  | H  | 5.788598  | -1.399368 | 2.267277  |
| 99  | H  | 6.969672  | -2.028754 | 0.165301  |
| 100 | H  | 5.965871  | -0.905979 | -0.785480 |
| 101 | H  | 7.128626  | -0.277613 | 0.426107  |
| 102 | Cr | -1.078920 | 2.803849  | 1.121002  |
| 103 | H  | 1.014770  | -0.196019 | 0.041079  |

### Filter Paper strip application

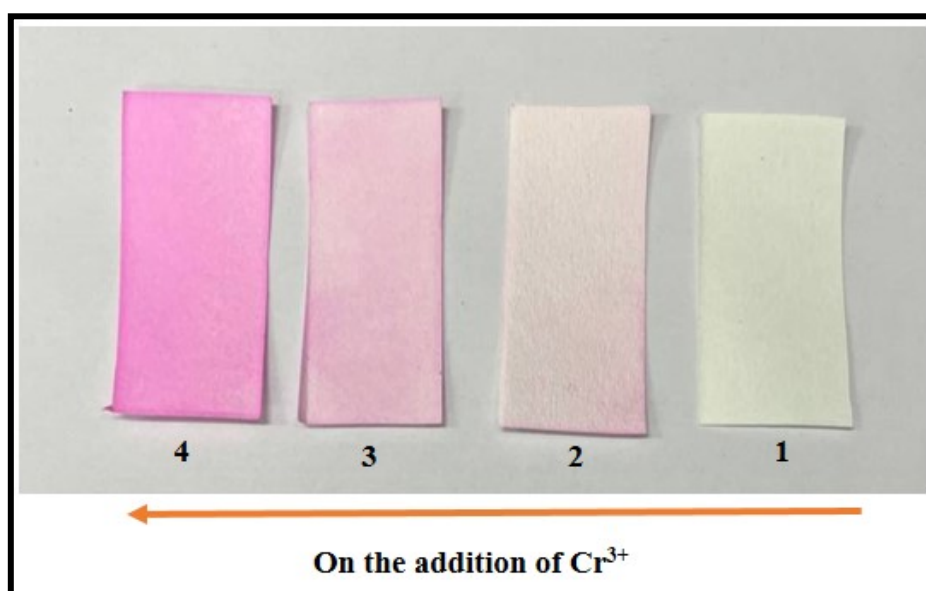

**Figure 10:** Paper strip test for S1 with different concentration of  $\text{Cr}^{3+}$  under visible light (b) Filter paper strips coated with S1, paper -1 coated with S1 only and filter paper 2,3,4 are coated with S1 and further treated with  $100\mu\text{M}$ ,  $10\text{mM}$ ,  $100\text{mM}$  of  $\text{Cr}^{3+}$  in water, respectively.

### References:

1. S. Youl, K. Hee, J. Ah, S. Young and C. Kim, *Tetrahedron*, 2016, **72**, 5563–5570.
2. A. Jebnoui, S. Teka, Y. Bahrouni, N. S. Jaballah, O. Bechambi and M. Majdoub, *Opt. Mater. (Amst)*, 2022, **134**, 113091.

3. L. K. Kumawat, N. Mergu, M. Asif and V. K. Gupta, *Sensors Actuators B Chem.*, 2016, **231**, 847–859.
4. L. K. Kumawat, N. Mergu, M. Asif and V. K. Gupta, *Sensors Actuators B Chem.*, 2016, **231**, 847–859.
5. S. Khan, M. Muhammad, J. S. Algethami, H. M. Al-Saidi, A. Almahri and A. A. Hassanian, *J. Fluoresc.*, 2022, **32**, 1889–1898.
6. O. V Dolomanov, L. J. Bourhis, R. J. Gildea, J. A. K. Howard and H. Puschmann, *J. Appl. Cryst.*, 2009, **42**, 339–341.
7. C. F. Macrae, P. R. Edgington, P. McCabe, E. Pidcock, G. P. Shields, R. Taylor, M. Towler and J. V. D. Streek, *J. Appl. Crystallogr.*, 2006, **39**, 453–457.
